# Supplementary material for: Role of deoxy group on the high concentration of graphene in surfactant/water media
Source: Royal Society of Chemistry journal article supplement (doi:10.1039/c2ra22343k), 2012-11-28
Supplement: c2ra22343k.pdf [file c2ra22343k.pdf]

## Supporting Information

### Role of Deoxy Group on the High Concentration of Graphene in Surfactant / Water Media

Parameshwari Ramalingam<sup>a</sup>, Sai Teja Pusuluri<sup>b</sup>, Sangeetha Periasamy<sup>c</sup>, Ramakrishnan Veerabahu<sup>c</sup> and Jeganathan Kulanthaivel<sup>a\*</sup>

<sup>a</sup> Centre for Nanoscience and Nanotechnology, School of Physics, Bharathidasan University, Tiruchirappalli, India.

<sup>b</sup> Department of Physics and Astronomy, Ohio University, Athens, Ohio-45701.

<sup>c</sup> Department of Laser Studies, School of Physics, Madurai Kamaraj University, Madurai, India.

\*E-mail: kjeganathan@yahoo.com; jagan@physics.bdu.ac.in

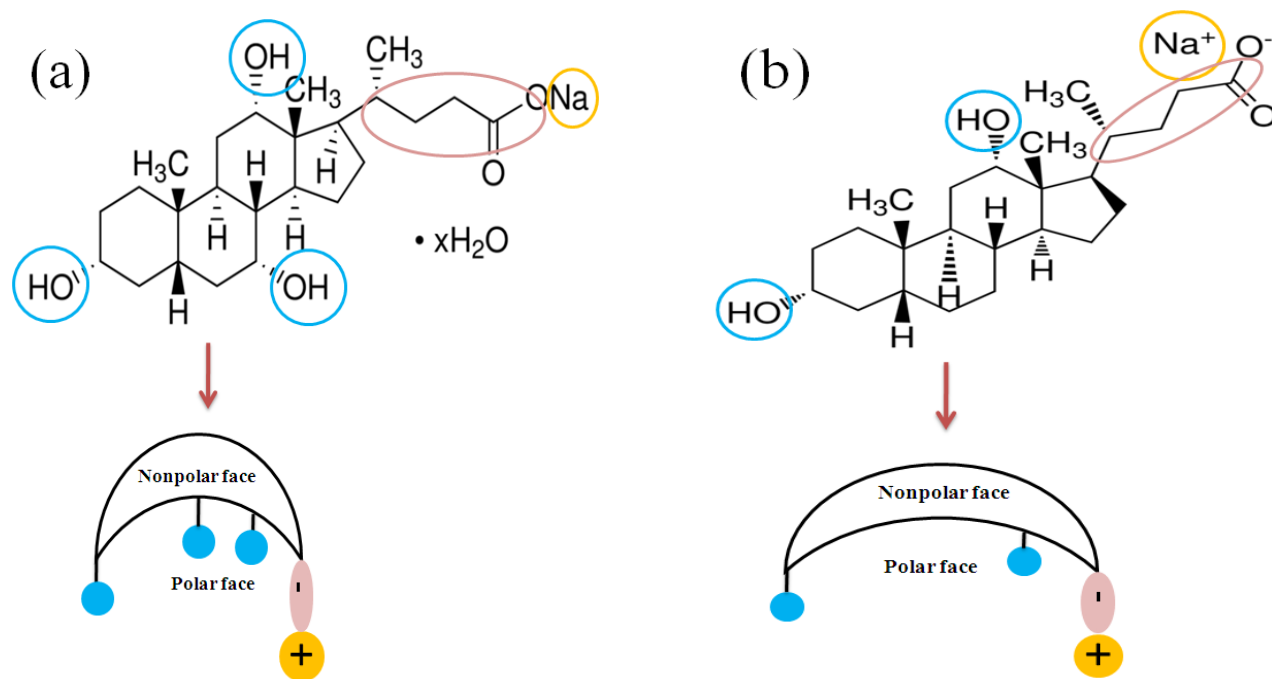

**Figure (S1):** Chemical and Schematic structure of sodium cholate and sodium deoxycholate bile salt surfactants

### Zeta Potential

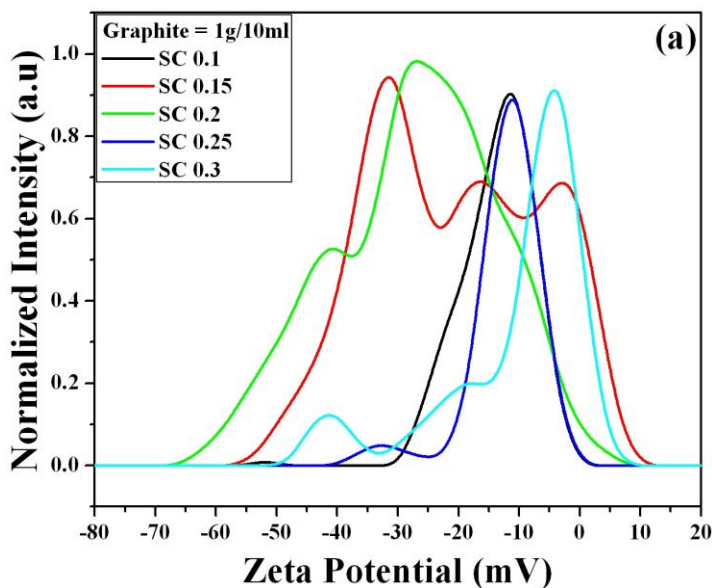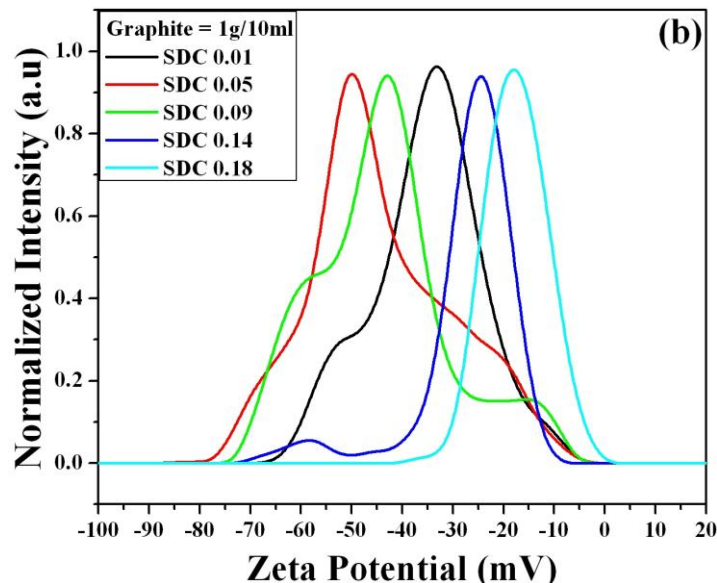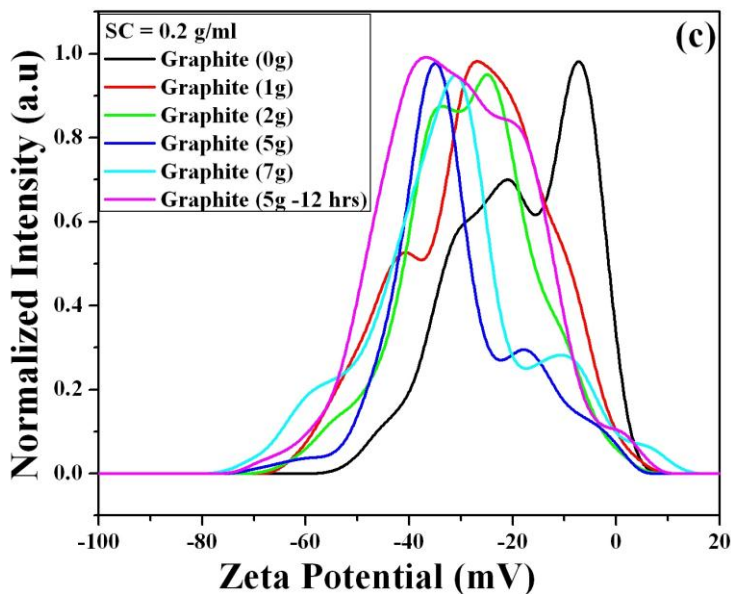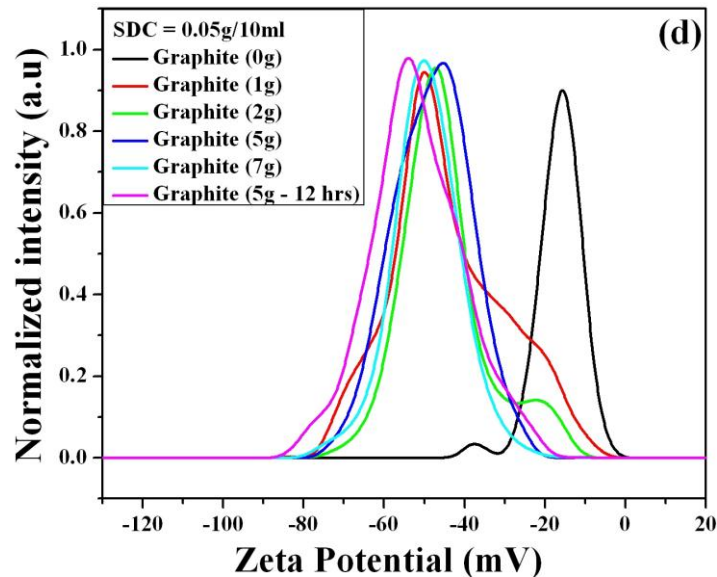

**Figure (S2) :** Zeta potential distribution curves for graphene dispersions prepared in different concentrations of Surfactants at constant initial graphite ( $C_G = 1\text{g}/10\text{mL}$ ) concentration as (a)  $C_{SCi}$  ( $i = 0.1$  to  $0.3\text{g}/10\text{mL}$ ) and (b)  $C_{SDCj}$  ( $j = 0.01$  to  $0.18\text{g}/10\text{mL}$ ); (c) and (d) for graphene dispersions prepared in various initial graphite concentrations at constant surfactant concentrations (c)  $C_{SC} = 0.2\text{g}$  and (d)  $C_{SDC} = 0.05\text{g}$  for initial  $C_{Gk} = 1$  to  $7\text{g}/10\text{mL}$ . Here, all samples were diluted equally in the ratio of (1:10) mL in water.

## FT-IR Study

There is an unusual hump evolved at  $2365\text{ cm}^{-1}$  in both which is mostly observed in reduced graphene oxides. Vibration of “aromatic” structure of graphite can be observed in the range of  $1550$  to  $1600\text{ cm}^{-1}$ .

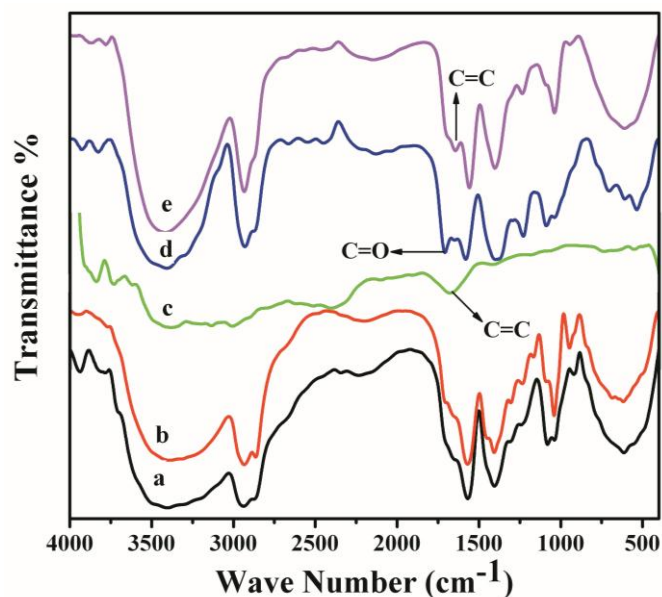

**Figure (S3).** FT-IR spectra of (a) Pure SC (b) Pure SDC (c) Graphite (d) SC-G and (e) SDC-G powders.

**Table (S1).** D, G and D' band positions and  $I_D/I_G$

| Sample             | D<br>( $\text{cm}^{-1}$ ) | G<br>( $\text{cm}^{-1}$ ) | D'<br>( $\text{cm}^{-1}$ ) | $I_D/I_G$ |
|--------------------|---------------------------|---------------------------|----------------------------|-----------|
| Graphite           | 1329                      | 1572                      | 1615                       | 0.3125    |
| SC-G Powder        | 1334                      | 1576                      | 1610                       | 0.7558    |
| SDC-G Powder       | 1328                      | 1568                      | 1576                       | 0.5172    |
| SC-G (12 hr) film  | 1329                      | 1581                      | 1615                       | 1.4000    |
| SDC-G (12 hr) film | 1329                      | 1583                      | 1617                       | 2.0070    |

**TABLE (S2). Deconvolute peaks of 2D band with corresponding FWHM and  $I_{2D}/I_G$  ratio**

| Sample                  | 2D <sub>1</sub><br>(cm <sup>-1</sup> ) | FWHM<br>(cm <sup>-1</sup> ) | 2D <sub>2</sub><br>(cm <sup>-1</sup> ) | FWHM<br>(cm <sup>-1</sup> ) | 2D <sub>3</sub><br>(cm <sup>-1</sup> ) | FWHM<br>(cm <sup>-1</sup> ) | 2D <sub>4</sub><br>(cm <sup>-1</sup> ) | FWHM<br>(cm <sup>-1</sup> ) | $I_{2D}/I_G$ |
|-------------------------|----------------------------------------|-----------------------------|----------------------------------------|-----------------------------|----------------------------------------|-----------------------------|----------------------------------------|-----------------------------|--------------|
| Graphite                | 2578                                   | 11                          | 2606                                   | 22                          | 2638                                   | 45                          | 2671                                   | 49                          | 0.4375       |
| SC-G<br>Powder          | 2586                                   | 36                          | 2615                                   | 11                          | 2641                                   | 40                          | 2665                                   | 48                          | 0.3488       |
| SDC-G<br>Powder         | 2582                                   | 13                          | 2613                                   | 55                          | 2646                                   | 42                          | 2676                                   | 42                          | 0.3201       |
| SC-G<br>(12hr)<br>film  | 2599                                   | 89                          | 2626                                   | 27                          | 2652                                   | 39                          | 2674                                   | 43                          | 0.4500       |
| SDC-G<br>(12hr)<br>film | -                                      | -                           | 2629                                   | 49                          | 2655                                   | 35                          | 2679                                   | 31                          | 0.4578       |

### Optical images

Optical Microscopic images were taken to analyze the dispersion quality of the higher concentration graphene dispersion for both SC and SDC surfactants. To record optical microscopic image, the samples were prepared by drop-casting (0.2mL) the SC-G and SDC-G dispersions on glass substrates. The samples were dried at 80°C for 1hr to evaporate the solvent. **Figure (S4)** shows the optical images of SC-G and SDC-G higher concentration dispersion coating. Black paint like coating is formed on glass substrate for SDC-G solution without any other sedimentation or particles. The boundary of the sample and glass substrate can be differentiated. Whereas, in SC-G coated substrate has the expelled Sodium cholate molecules which is present as spherical micelles out of the graphene surfaces and also agglomerated on substrate.

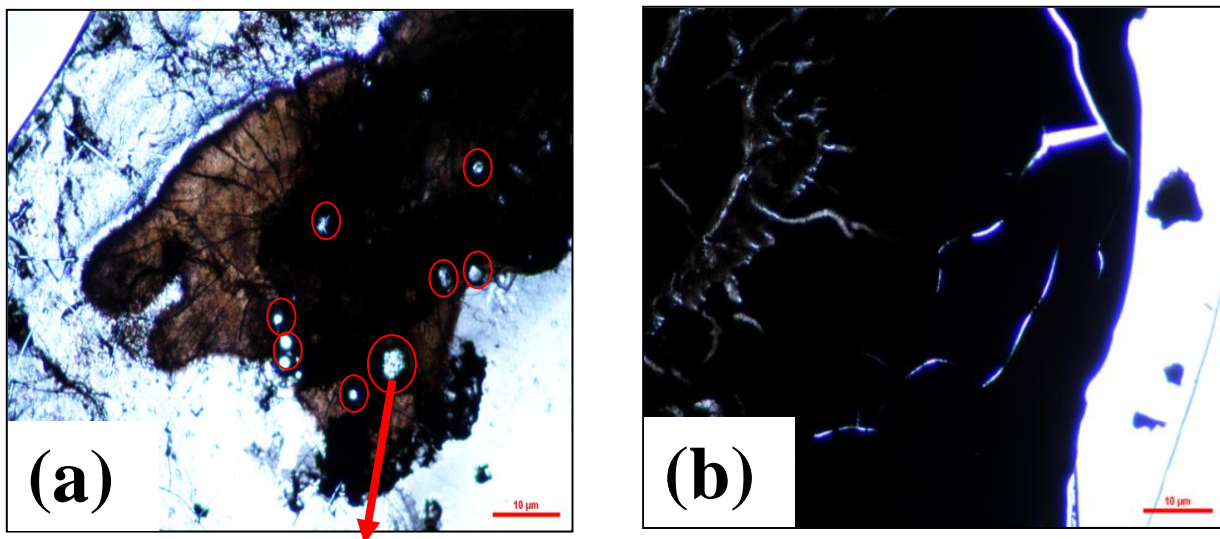

SC

**Figure (S4):** Optical images of graphene dispersions (a) SC-G and (b) SDC-G drop-casted on glass substrates. Expulsion of SC surfactant from the graphene surface can clearly be observed.

### AFM images

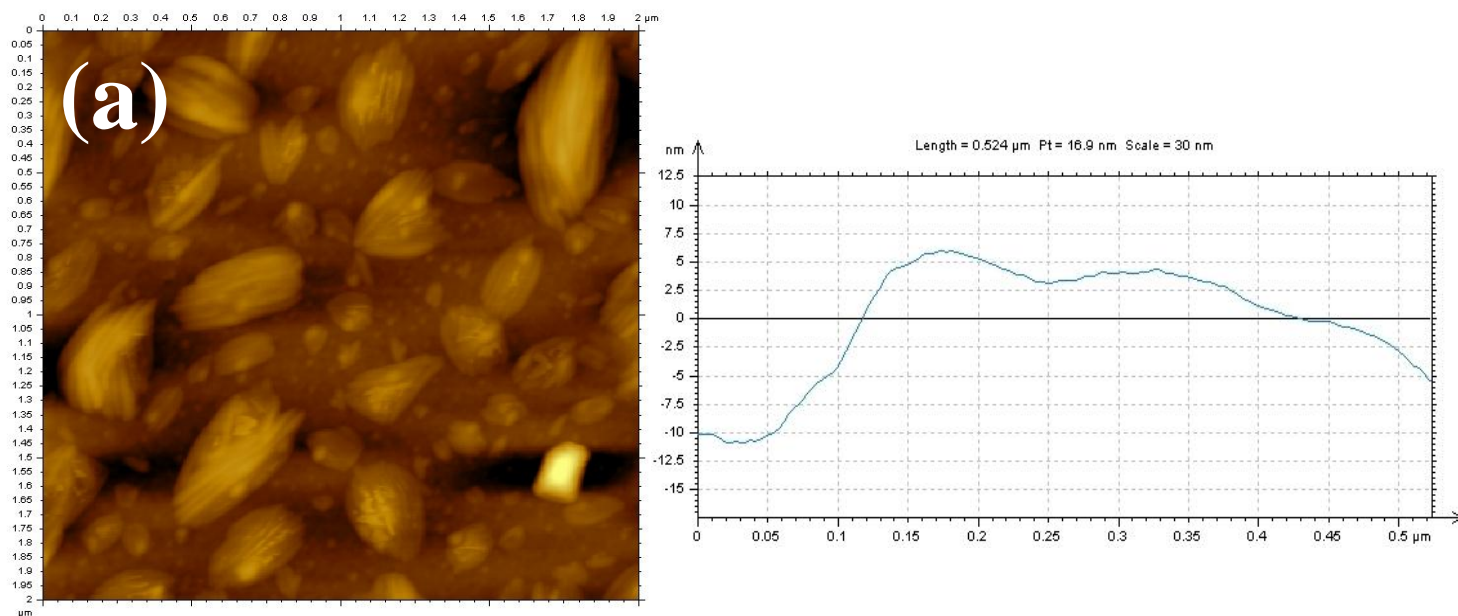

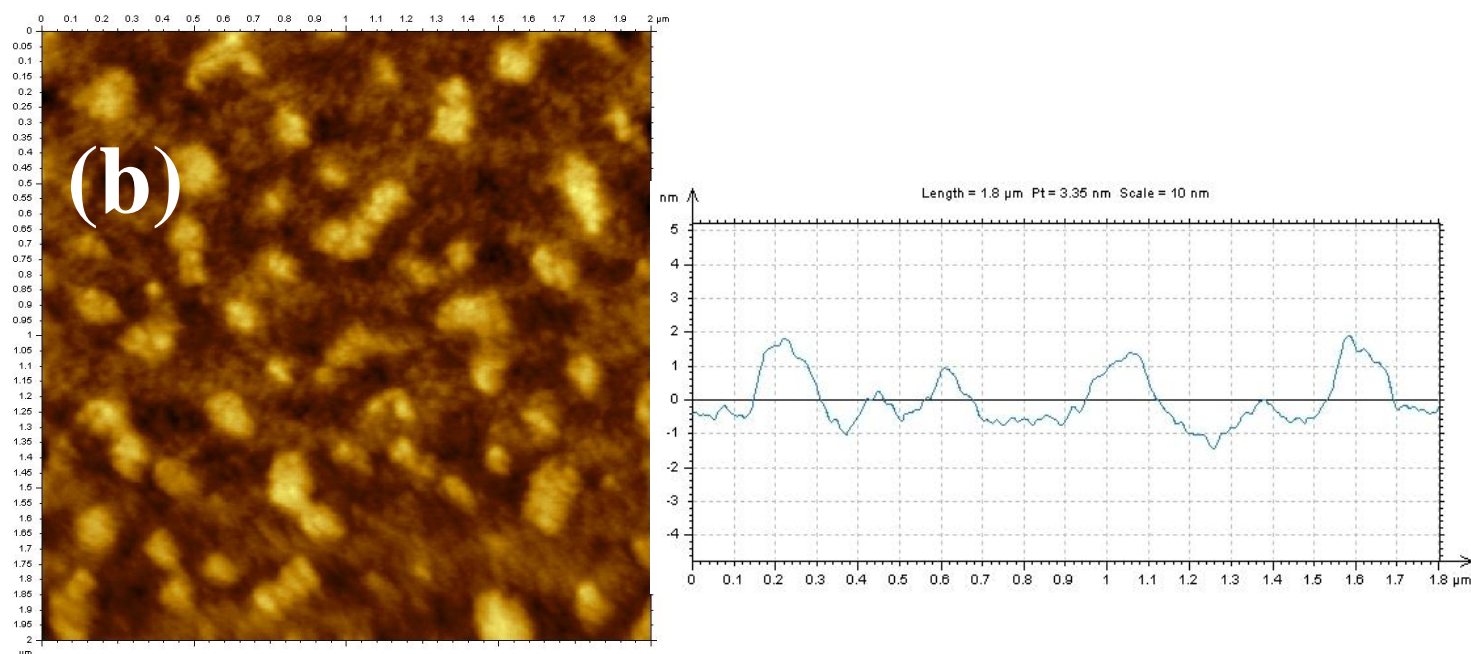

**Figure (S5):** AFM images of (a) SC-G and (b) SDC-G dispersions coated on glass substrate in the  $2\mu\text{m}\times 2\mu\text{m}$  scale to visualize few layer graphene.

### UV-Visible Transmittance Spectrum

UV-Visible Transmittance spectra of spin coated (1500rpm) SC-G and SDC-G dispersions on corning glass substrate and subsequently annealed under vacuum at  $450^{\circ}\text{C}$  for one hour is shown in **Figure (S6)**. SDC-G coated substrate highly transmits (67%) the ultra-violet light as compared to SC-G coated substrate (59%). The inset shows the transmittance of both samples without annealing. The amount of transmittance is enhanced in both the cases with annealing as due to the elimination of surfactant and water molecules. As observed in Atomic force microscopy and Raman spectra of SDC-G coated graphene have few layers (1~5), but stacking of graphene layers is more in SC-G dispersion which forbids the transmittance of electromagnetic radiation in UV-visible region due to poor optical quality of the sample. Despite the fact that graphene multilayer is transparent to optical radiation, the observed transmittance of 67% for SDC-G coated glass

with expected thickness of 1-5 multilayers is very low. Hence, a detailed investigation as a function of graphene layers is mandatory for future transparent conducting anode applications.

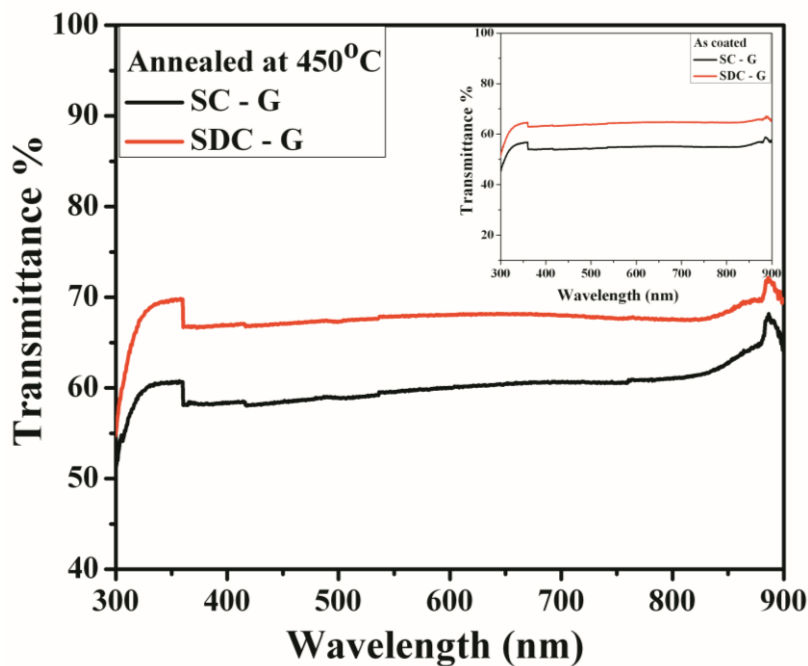

**Figure (S6).** UV-visible transmittance spectra of SC-G (0.2g/10mL) and SDC-G (0.05g/10mL) dispersions spin-coated on glass substrate and annealed at 450°C in vacuum. The inset shows the transmittance of as-coated films.
